# Supplementary material
Source: PubMed Central journal article supplement (PMC6367015)
Supplement: NIHMS999716-supplement-1.pdf [file NIHMS999716-supplement-1.pdf]

Supplemental Table 1. Negative Affect Items by Study

| NA items                                | EMA                 |                   |          |          |          | EOD      |                     |                   |          |          |
|-----------------------------------------|---------------------|-------------------|----------|----------|----------|----------|---------------------|-------------------|----------|----------|
|                                         | ESCAPE <sup>a</sup> | SAWM <sup>a</sup> | SHADE    | WDL      | NTH      | WDL      | ESCAPE <sup>a</sup> | SAWM <sup>a</sup> | NSDE     | WFHS     |
| tense                                   |                     | <b>x</b>          |          |          | <b>x</b> |          |                     | <b>x</b>          |          |          |
| tense/ anxious                          | <b>x</b>            |                   |          |          |          |          | <b>x</b>            |                   |          |          |
| nervous                                 |                     |                   |          |          | <b>x</b> |          |                     |                   | <b>x</b> | <b>x</b> |
| jittery                                 |                     |                   |          |          |          |          |                     |                   | <b>x</b> | <b>x</b> |
| worried                                 |                     |                   | <b>x</b> |          |          |          |                     |                   |          |          |
| distressed                              |                     |                   |          |          |          |          |                     |                   |          | <b>x</b> |
| depressed                               |                     |                   | <b>x</b> |          | <b>x</b> |          |                     |                   |          |          |
| depressed/blue                          | <b>x</b>            |                   |          |          |          |          | <b>x</b>            |                   |          |          |
| sad                                     |                     | <b>x</b>          |          | <b>x</b> | <b>x</b> | <b>x</b> |                     | <b>x</b>          |          |          |
| so sad nothing<br>could cheer<br>you up |                     |                   |          |          |          |          |                     |                   | <b>x</b> |          |
| unhappy                                 | <b>x</b>            |                   | <b>x</b> |          |          |          | <b>x</b>            |                   |          |          |
| lonely                                  |                     |                   |          |          |          |          |                     |                   | <b>x</b> |          |
| hopeless                                |                     |                   |          |          |          |          |                     |                   | <b>x</b> |          |
| worthless                               |                     |                   |          |          |          |          |                     |                   | <b>x</b> |          |
| disappointed                            |                     | <b>x</b>          |          |          |          |          |                     | <b>x</b>          |          |          |
| frustrated                              | <b>x</b>            |                   | <b>x</b> |          |          |          | <b>x</b>            |                   | <b>x</b> |          |
| angry                                   |                     |                   | <b>x</b> |          | <b>x</b> |          |                     |                   | <b>x</b> |          |
| hostile                                 |                     |                   |          |          | <b>x</b> |          |                     |                   |          | <b>x</b> |

|                             |          |          |          |          |
|-----------------------------|----------|----------|----------|----------|
| angry/hostile               | <b>x</b> | <b>x</b> |          |          |
| irritable                   |          |          | <b>x</b> | <b>x</b> |
| afraid                      |          |          | <b>x</b> | <b>x</b> |
| ashamed                     |          |          | <b>x</b> | <b>x</b> |
| restless or<br>fidgety      |          |          | <b>x</b> |          |
| scared                      |          |          |          | <b>x</b> |
| guilty                      |          |          |          | <b>x</b> |
| everything<br>was an effort |          |          | <b>x</b> |          |
| upset                       | <b>x</b> | <b>x</b> | <b>x</b> | <b>x</b> |

Note. EMA: Ecological Momentary Assessment. EOD: End-of-Day. <sup>a</sup>Hybrid studies providing both EMA and EOD assessments.

Supplemental Table 2. Linear Multilevel Models of Age Predicting Stressor-Related Negative Affect (Study-Specific Scale Scores)

|             | EMA                 |                     |                    |                    |                    | EOD                 |                     |                    |                     |
|-------------|---------------------|---------------------|--------------------|--------------------|--------------------|---------------------|---------------------|--------------------|---------------------|
|             | ESCAPE <sup>a</sup> | SAWM <sup>a</sup>   | SHADE              | WDL                | NTH                | ESCAPE <sup>a</sup> | SAWM <sup>a</sup>   | NSDE               | WFH                 |
|             | Estimate            | Estimate            | Estimate           | Estimate           | Estimate           | Estimate            | Estimate            | Estimate           | Estimate            |
| Model 1     | (SE)                | (SE)                | (SE)               | (SE)               | (SE)               | (SE)                | (SE)                | (SE)               | (SE)                |
| Intercept   | 18.602<br>(1.402)** | 1.852<br>(0.059)**  | 0.712<br>(0.124)** | .1181<br>(0.086)** | 1.405<br>(0.031)** | 22.322<br>(1.113)** | 1.892<br>(0.074)**  | 0.128<br>(0.006)** | 1.193<br>(0.021)**  |
| Age         | -0.128<br>(0.092)   | -0.011<br>(0.003)** | -0.009<br>(0.005)  | -0.014<br>(0.006)* | -0.002<br>(0.002)  | -0.209<br>(0.105)*  | -0.018<br>(0.004)** | -0.000<br>(0.000)  | -0.006<br>(0.002)** |
| WP Stressor | 15.520<br>(0.802)** | 1.093<br>(0.075)**  | 0.810<br>(0.062)** | 0.184<br>(0.061)** | 0.563<br>(0.036)** | 9.779<br>(0.864)**  | 0.599<br>(0.088)**  | 0.181<br>(0.007)** | 0.202<br>(0.018)**  |

|              |          |         |         |         |         |         |         |           |         |
|--------------|----------|---------|---------|---------|---------|---------|---------|-----------|---------|
| WP           | -0.161   | -0.003  | -0.001  | 0.002   | -0.001  | -0.107  | -0.002  | -0.002    | -0.003  |
| Stressor*Age | (0.074)* | (0.004) | (0.005) | (0.005) | (0.003) | (0.080) | (0.005) | (0.000)** | (0.002) |

Model 2

---

|             |           |           |           |          |           |           |           |           |           |
|-------------|-----------|-----------|-----------|----------|-----------|-----------|-----------|-----------|-----------|
|             | 17.363    | 1.688     | 0.606     | 0.1.240  | 1.448     | 22.054    | 1.803     | 0.173     | 1.315     |
| Intercept   | (2.199)** | (0.194)** | (0.222)** | (0.206)  | (0.092)** | (2.202)** | (0.241)** | (0.010)** | (0.029)** |
|             | -0.123    | -0.013    | -0.006    | -0.010   | -0.003    | -0.230    | -0.018    | -0.001    | -0.004    |
| Age         | (0.097)   | (0.004)** | (0.006)   | (0.007)  | (0.003)   | (0.110)*  | (0.005)** | (0.000)** | (0.003)   |
|             | 16.571    | 1.838     | 0.744     | 0.426    | 0.651     | 9.545     | 0.568     | 0.179     | 0.193     |
| WP Stressor | (1.390)** | (0.201)** | (0.166)** | (0.165)* | (0.096)** | (1.547)** | (0.243)*  | (0.012)** | (0.024)** |

|              |           |         |         |         |         |         |         |           |         |
|--------------|-----------|---------|---------|---------|---------|---------|---------|-----------|---------|
| WP           | -0.192    | 0.007   | 0.001   | -0.005  | -0.005  | -0.099  | -0.003  | -0.003    | -0.002  |
| Stressor*Age | (0.077)** | (0.005) | (0.005) | (0.006) | (0.003) | (0.083) | (0.006) | (0.000)** | (0.002) |

Note. WP: Within-Person. EMA: Ecological Momentary Assessment. EOD: End-of-Day. SE: Standard Error. \* $p < .05$ , \*\* $p < .01$ . Age was centered at 46 years old in each study. Model 1: Age only. Model 2: Model 1 plus covariates (sex, education, race, employment status, marital status, and day of week). <sup>a</sup>Hybrid studies providing both EMA and EOD assessments.



|       |                    |                   |                   |                   |                   |                   |                  |                      |                   |
|-------|--------------------|-------------------|-------------------|-------------------|-------------------|-------------------|------------------|----------------------|-------------------|
| 40-59 | -0.233<br>(0.184)  | -0.154<br>(0.320) | -0.030<br>(0.245) | -0.230<br>(0.219) | -0.028<br>(0.123) | -0.044<br>(0.194) | 0.087<br>(0.371) | -0.043<br>(0.056)    | -0.094<br>(0.087) |
| 60-74 | -0.565<br>(0.243)* | -0.393<br>(0.344) | -0.280<br>(0.409) | -0.177<br>(0.580) | 0.046<br>(0.213)  | -0.471<br>(0.265) | 0.141<br>(0.377) | --0.167<br>(0.059)** | -0.403<br>(0.415) |
| 75+   | -                  | -0.167<br>(0.460) | -0.389<br>(1.022) | -                 | -                 | -                 | 0.049<br>(0.561) | --0.230<br>(0.075)** | -                 |

Model 2

---

|             |           |           |           |         |           |           |         |           |           |
|-------------|-----------|-----------|-----------|---------|-----------|-----------|---------|-----------|-----------|
|             | 1.574     | 2.674     | 1.126     | 0.646   | 1.079     | 1.104     | 0.814   | 542       | 0.682     |
| WP Stressor | (0.268)** | (0.492)** | (0.354)** | (0.362) | (0.194)** | (0.217)** | (0.494) | (0.062)** | (0.157)** |

|       |           |         |         |         |         |         |         |           |         |
|-------|-----------|---------|---------|---------|---------|---------|---------|-----------|---------|
| <25   | -         | -0.018  | -0.184  | -0.326  | -0.089  | -       | 0.671   | -         | -0.024  |
|       |           | (0.483) | (0.382) | (0.393) | (0.264) |         | (0.588) |           | (0.624) |
| 25-39 | Ref.      | Ref.    | Ref.    | Ref.    | Ref.    | Ref.    | Ref.    | Ref.      | Ref.    |
| 40-59 | -0.264    | 0.306   | 0.090   | -0.255  | -0.055  | -0.096  | -0.046  | -0.042    | -0.032  |
|       | (0.181)   | (0.313) | (0.249) | (0.233) | (0.131) | (0.197) | (0.378) | (0.058)   | (0.099) |
| 60-74 | -0.710    | 0.309   | -0.049  | -0.187  | -0.185  | -0.476  | 0.286   | -0.193    | -0.301  |
|       | (0.257)** | (0.365) | (0.446) | (0.598) | (0.242) | (0.287) | (0.408) | (0.062)** | (0.428) |
| 75+   | -         | 0.643   | -0.318  | -       | -       | -       | 0.011   | -0.278    | -       |
|       |           | (0.464) | (1.039) |         |         |         | (0.590) | (0.080)** |         |



Note. WP: Within-Person. EMA: Ecological Momentary Assessment. EOD: End-of-Day. SE: Standard Error. \* $p < .05$ , \*\* $p < .01$ . Ref.= Reference group (ages 25-39). Model 1: Age only. Model 2: Model 1 plus covariates (sex, education, race, employment status, marital status, and day of week). <sup>a</sup>Hybrid studies providing both EMA and EOD assessments.

*Supplemental Table 4. Results from Monte Carlo Simulations for Power to Detect Within-person Stressor Effect and Age Differences in Within-person Stressor Effects on Negative Affect*

|                | EMA                 |                   |       |       |       | EOD                 |                   |       |       |
|----------------|---------------------|-------------------|-------|-------|-------|---------------------|-------------------|-------|-------|
|                | ESCAPE <sup>a</sup> | SAWM <sup>a</sup> | SHADE | WDL   | NTH   | ESCAPE <sup>a</sup> | SAWM <sup>a</sup> | NSDE  | WFH   |
| WP<br>Stressor | 1.000               | 1.000             | 1.000 | 0.915 | 1.000 | 1.000               | 1.000             | 1.000 | 1.000 |
| WP<br>Stressor | .752                | .188              | .092  | .083  | .079  | .313                | .086              | .999  | .436  |
| *Age           |                     |                   |       |       |       |                     |                   |       |       |

Note. Based on 1000 simulations per study. WP: Within-Person. EMA: Ecological Momentary Assessment. EOD: End-of-Day. <sup>a</sup>Hybrid studies providing both EMA and EOD assessments.
